# Supplementary material for: Electronic structure and lattice dynamics of Ba2CuTeO6 single crystals
Source: Royal Society of Chemistry journal article supplement (doi:10.1039/d0ra02314k), 2020-01-01
Supplement: d0ra02314k1.pdf [file d0ra02314k1.pdf]

## Supplementary information

### Electronic structure and lattice dynamics of Ba<sub>2</sub>CuTeO<sub>6</sub> single crystals

Yun Chen Chung<sup>1</sup>, Sunil K. Karna<sup>2</sup>, Fan-Cheng Chou<sup>2</sup>, and Hsiang-Lin Liu<sup>1,\*</sup>

<sup>1</sup> Department of Physics, National Taiwan Normal University, Taipei 11677, Taiwan

<sup>2</sup> Center for Condensed Matter Sciences, National Taiwan University, Taipei 10617, Taiwan

\*Corresponding author: hliu@ntnu.edu.tw

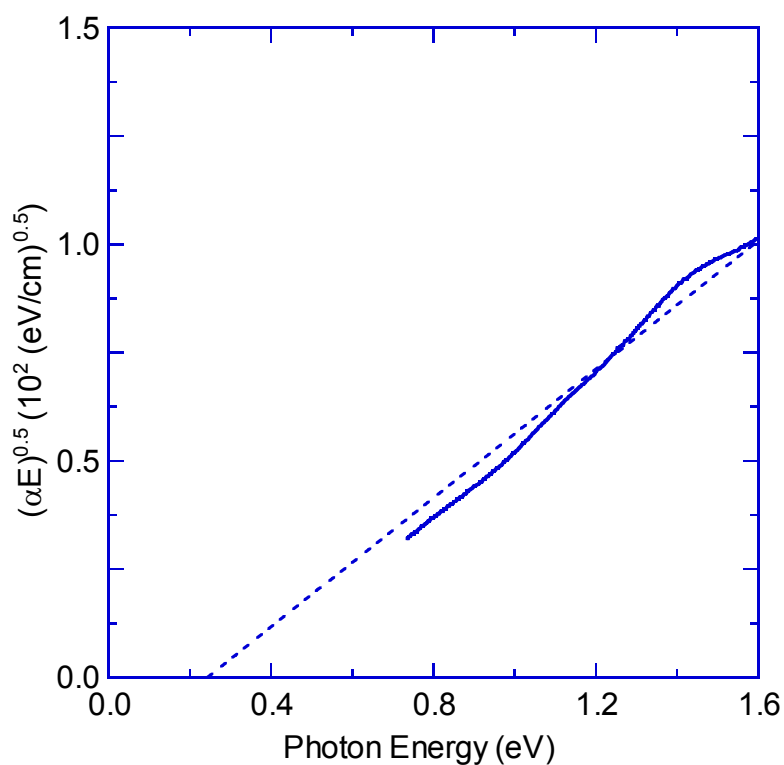

Supplementary Fig. 1 The indirect band gap analysis of Ba<sub>2</sub>CuTeO<sub>6</sub>.

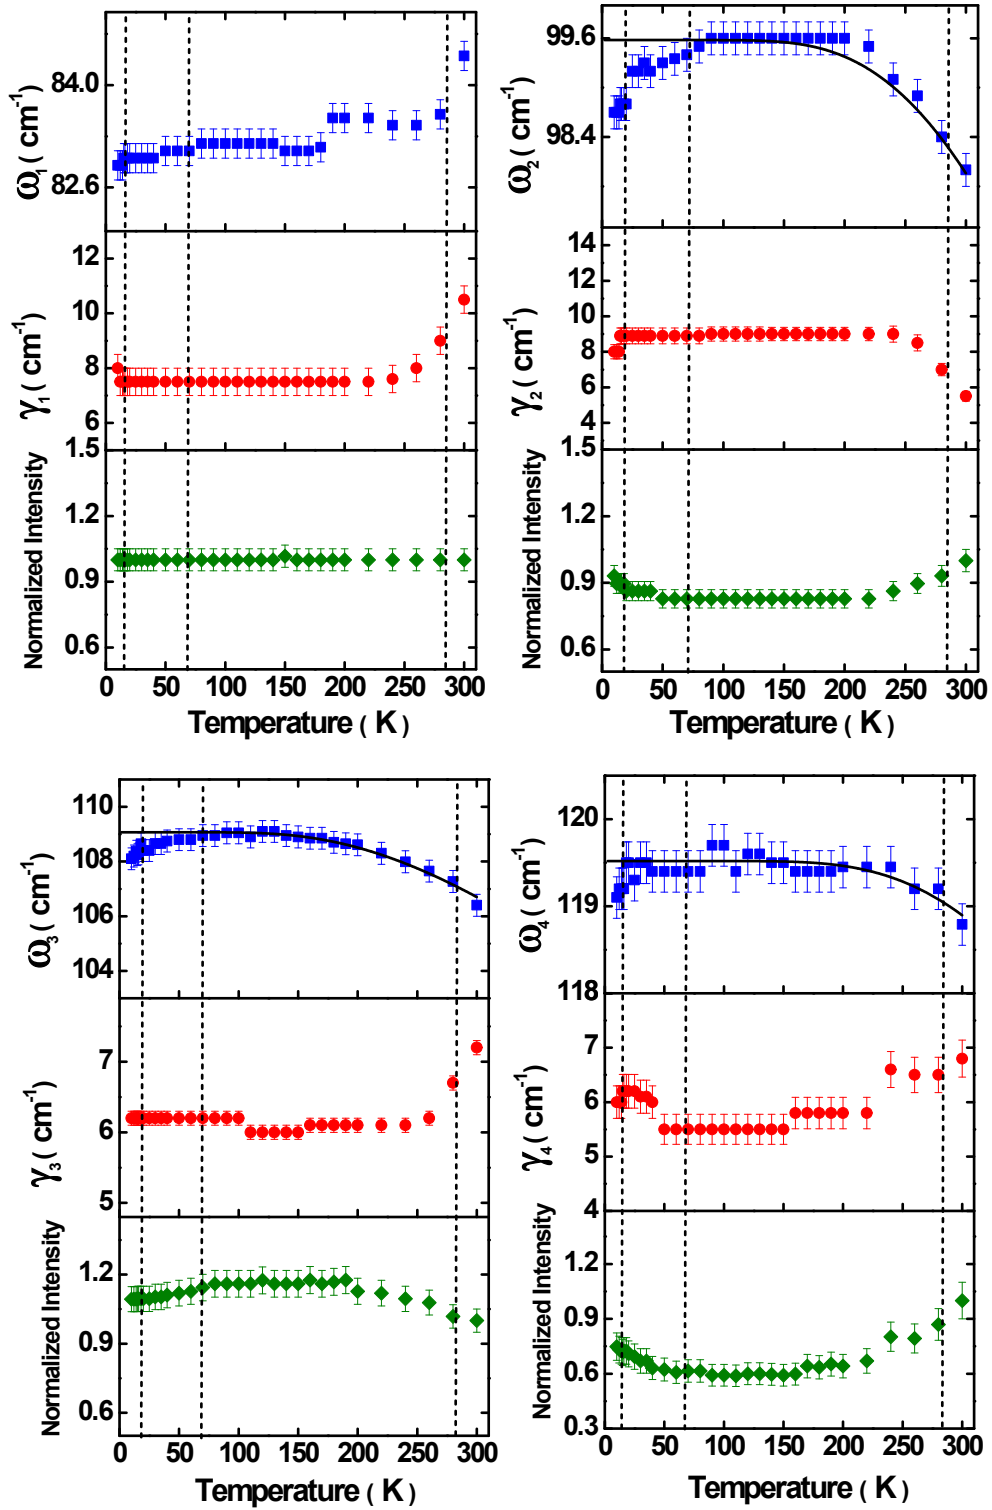

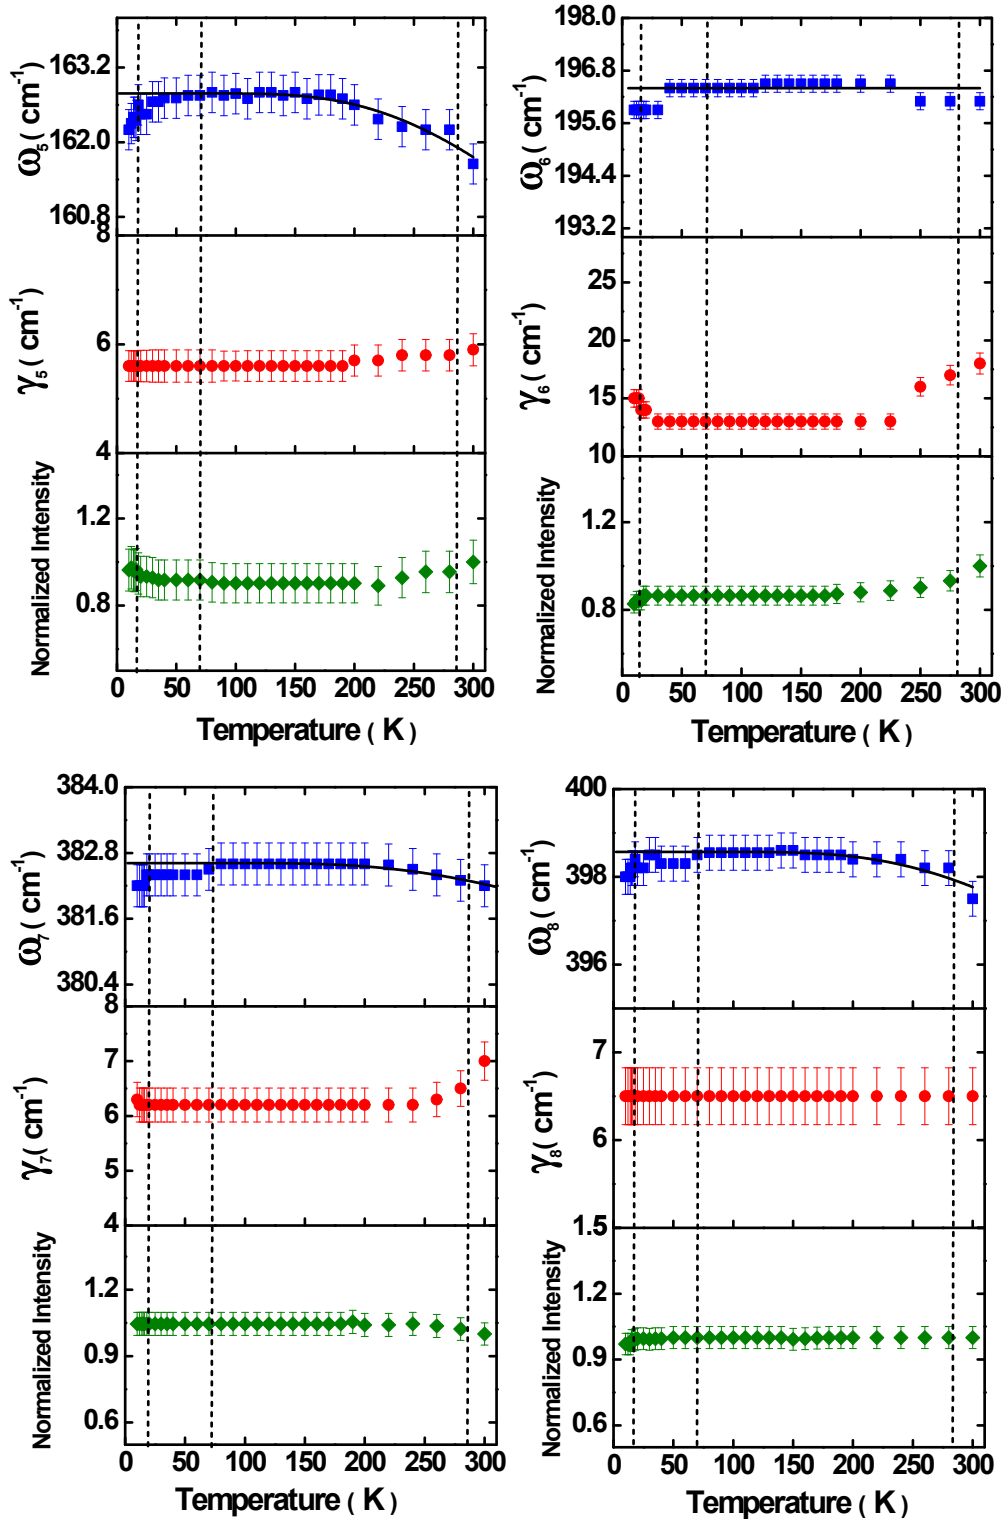

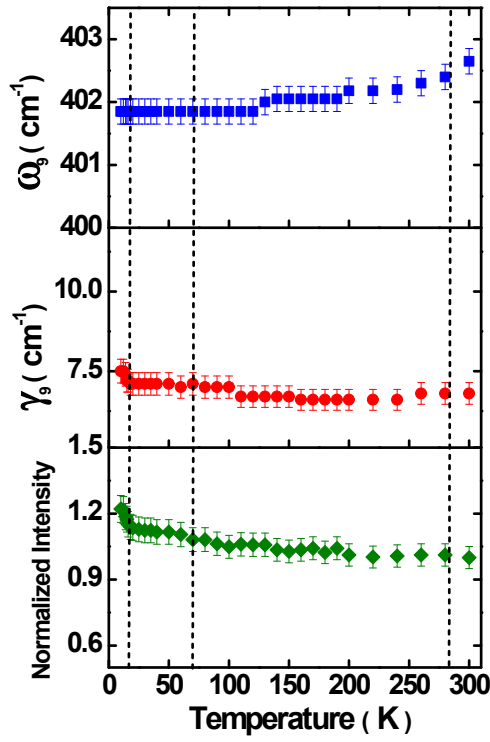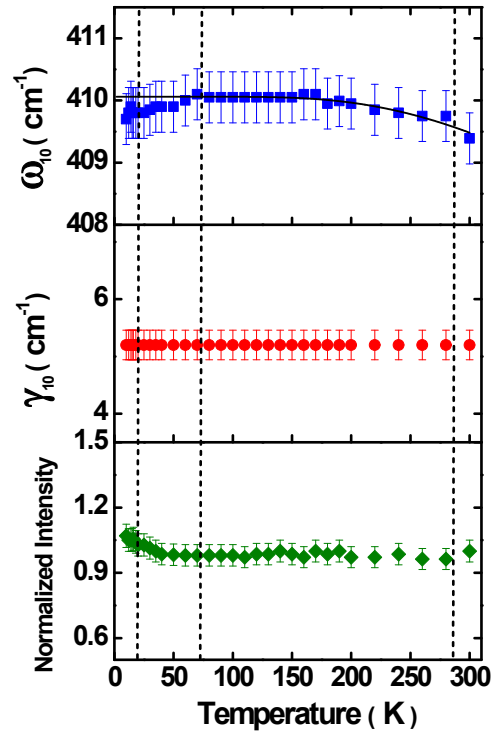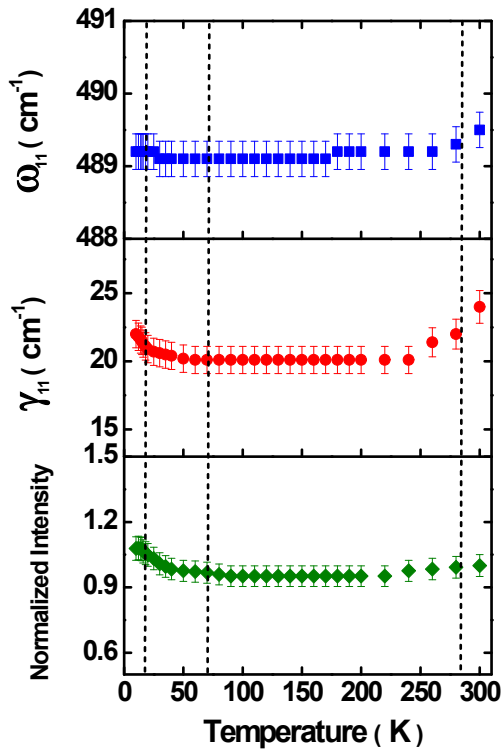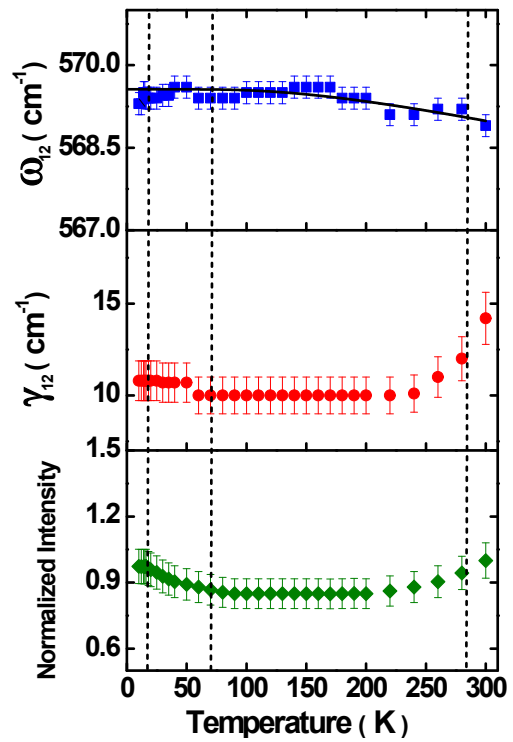

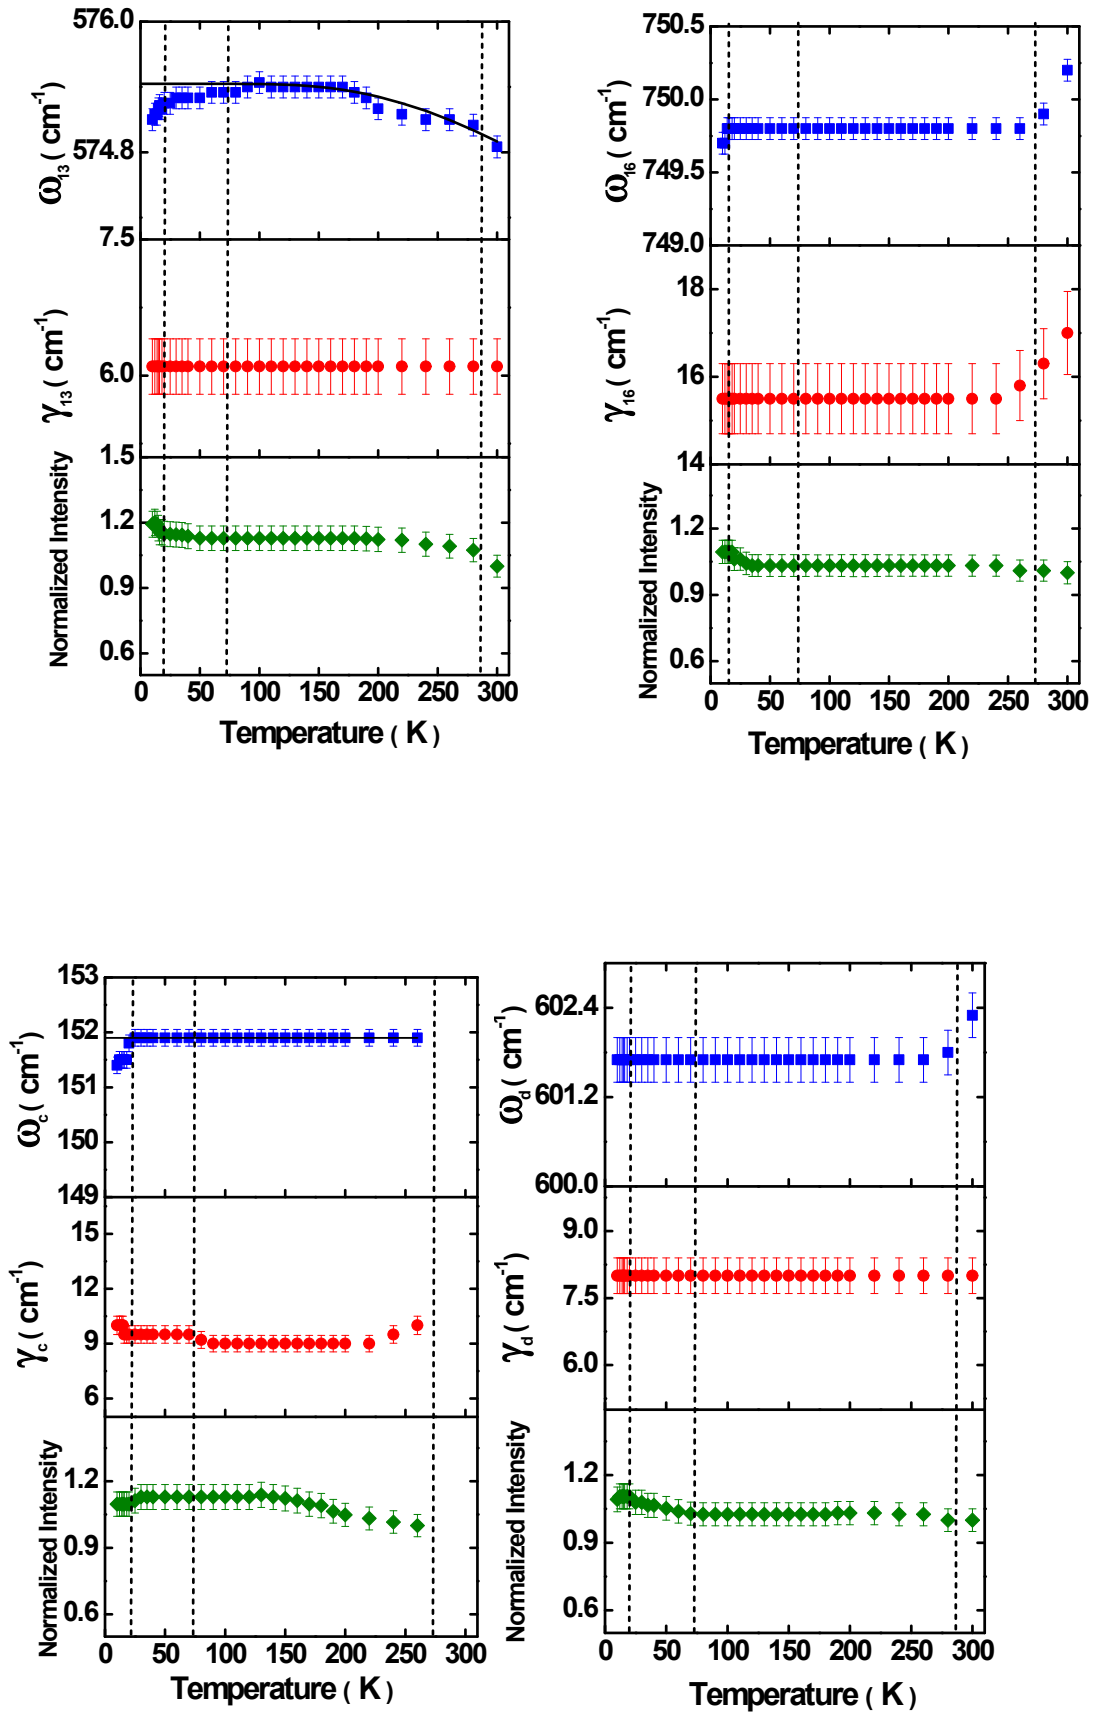

Supplementary Fig. 2 Temperature dependence of peak energy, damping, and normalized intensity of  $\text{Ba}_2\text{CuTeO}_6$ .
